# Supplementary material for: Dietary Probiotics Modulate Gut Barrier and Immune-Related Gene Expression and Histomorphology in Broiler Chickens under Non- and Pathogen-Challenged Conditions: A Meta-Analysis
Source: MDPI journal article supplement (doi:10.3390/ani13121970), 2023-06-13
Supplement: s1 [file s1]

## Article

# Dietary Probiotics Modulate Gut Barrier and Immune-Related Gene Expression and Histomorphology in Broiler Chickens under Non- and Pathogen-Challenged Conditions: A Meta-Analysis

Fitra Yosi <sup>1,2,3</sup> and Barbara U. Metzler-Zebeli <sup>1,2,\*</sup>

<sup>1</sup> Unit Nutritional Physiology, Institute of Physiology, Pathophysiology, and Biophysics, Department of Biomedical Sciences, University of Veterinary Medicine Vienna, 1210 Vienna, Austria; fitra.yosi@vetmeduni.ac.at or fitrayosi@unsri.ac.id

<sup>2</sup> Christian-Doppler Laboratory for Innovative Gut Health Concepts of Livestock, University of Veterinary Medicine Vienna, 1210 Vienna, Austria

<sup>3</sup> Department of Animal Science, Faculty of Agriculture, University of Sriwijaya, Palembang 30662, Indonesia

\* Correspondence: barbara.metzler@vetmeduni.ac.at

**Citation:** Yosi, F.; Metzler-Zebeli, B.U. Dietary Probiotics Modulate Gut Barrier and Immune-Related Gene Expression and Histomorphology in Broiler Chickens under Non- and Pathogen-Challenged Conditions: A Meta-Analysis. *Animals* **2023**, *13*, 1970. <https://doi.org/10.3390/ani13121970>

Academic Editor: Vincenzo Tufarelli

Received: 9 May 2023

Revised: 1 June 2023

Accepted: 9 June 2023

Published: 13 June 2023

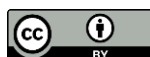

**Copyright:** © 2023 by the authors. Licensee MDPI, Basel, Switzerland. This article is an open access article distributed under the terms and conditions of the Creative Commons Attribution (CC BY) license (<https://creativecommons.org/licenses/by/4.0/>).

**Table S1.** List of references and the respective experimental variables included in the meta-analysis.

| Study | Reference               | Basal Diet <sup>3</sup>                                                                           | Dietary Probiotics <sup>1</sup>                                                                 | Pathogen |     | Route                                                                                 | Gut Segments |   |   |   | Variables |     |     |     |
|-------|-------------------------|---------------------------------------------------------------------------------------------------|-------------------------------------------------------------------------------------------------|----------|-----|---------------------------------------------------------------------------------------|--------------|---|---|---|-----------|-----|-----|-----|
|       |                         |                                                                                                   |                                                                                                 | No       | Yes |                                                                                       | D            | J | I | C | BAR       | IMU | HIS | GRO |
| 1     | Zhen et al. (2018)      | corn, soybean meal                                                                                | <i>B. coagulans</i>                                                                             | x        | x   | <i>S. enteritidis</i>                                                                 | oral         | x |   |   | x         | x   | x   | x   |
| 2     | Kan et al. (2021)       | corn, wheat, soy-bean meal                                                                        | <i>B. licheniformis</i>                                                                         |          | x   | <i>E. maxima</i> , <i>C. perfringens</i>                                              | oral         | x |   |   | x         | x   |     | x   |
| 3     | Zhang et al. (2021)     | corn, soybean meal, fish meal                                                                     | <i>B. coagulans</i>                                                                             | x        |     |                                                                                       |              |   | x |   | x         |     |     | x   |
| 4     | Li et al. (2015)        | corn gluten meal                                                                                  | <i>B. amyloliquefaciens</i>                                                                     |          | x   | <i>Escherichia coli</i>                                                               | injection    | x | x |   | x         | x   | x   | x   |
| 5     | Liu et al. (2021)       | corn, soybean meal                                                                                | <i>B. subtilis</i>                                                                              |          | x   | <i>C. perfringens</i>                                                                 | oral         | x |   |   | x         | x   |     |     |
| 6     | Wang et al. (2021)      | corn, soybean meal, corn gluten meal                                                              | <i>B. subtilis</i>                                                                              |          | x   | <i>C. perfringens</i><br><i>E. maxima</i> , <i>E. tenella</i> , <i>C. perfringens</i> | oral         | x |   |   | x         |     | x   | x   |
| 7     | Wu et al. (2018)        | corn, soybean meal, corn, wheat, distiller grain, soybean meal, corn protein powder, peanut meal, | <i>B. coagulans</i>                                                                             | x        | x   | <i>perfringens</i>                                                                    | oral         | x |   |   | x         | x   | x   | x   |
| 8     | Musa et al. (2019)      | der, peanut meal,                                                                                 | <i>B. subtilis</i> , <i>B. licheniformis</i>                                                    |          | x   | <i>C. perfringens</i>                                                                 | oral         | x | x | x | x         |     | x   | x   |
| 9     | Bilal et al. (2021)     | corn, soybean meal                                                                                | <i>B. subtilis</i> , <i>B. pumilus</i><br><i>B. licheniformis</i> , <i>B. amyloliquefaciens</i> | x        |     | <i>E. maxima</i> , <i>E. tenella</i> , <i>E. acervulina</i>                           |              |   | x |   | x         |     |     | x   |
| 10    | Chaudhari et al. (2020) | corn, soybean meal                                                                                | <i>lolinefaciens</i>                                                                            |          | x   |                                                                                       | oral         | x |   | x | x         | x   |     |     |
| 11    | Wu et al. (2021)        | corn, soybean meal, corn, bran, soybean meal, cottonseed                                          | <i>L. acidophilus</i>                                                                           | x        | x   | <i>Escherichia coli</i>                                                               | oral         | x | x |   | x         | x   | x   | x   |
| 12    | Xu et al. (2021)        | meal, cottonseed                                                                                  | <i>C. butyricum</i>                                                                             | x        | x   | <i>E. maxima</i> , <i>C. perfringens</i>                                              | oral         |   | x |   | x         | x   |     |     |

|    |                           | meal, corn gluten meal                                      |                                                                                                             |   |   |                         |           |   |   |   |   |   |   |
|----|---------------------------|-------------------------------------------------------------|-------------------------------------------------------------------------------------------------------------|---|---|-------------------------|-----------|---|---|---|---|---|---|
| 13 | Wu et al. (2019)          | corn, soybean meal                                          | <i>E. faecium</i>                                                                                           | x | x | <i>C. perfringens</i>   | oral      | x |   | x | x |   |   |
| 14 | He et al. (2019)          | corn, soybean meal, fish meal, corn gluten meal             | <i>B. subtilis</i> , <i>B. licheniformis</i> , <i>S. cerevisiae</i>                                         | x |   |                         |           | x | x | x |   | x | x |
| 15 | Memon et al. (2021)       | corn, soybean meal                                          | <i>B. subtilis</i>                                                                                          |   | x | <i>E. tenella</i>       | oral      |   |   | x | x |   |   |
| 16 | Mountzouris et al. (2019) | corn, soybean meal                                          | <i>L. reuteri</i> , <i>L. salivarius</i> , <i>E. faecium</i> , <i>Bi. animalis</i> , <i>P. acidilactici</i> | x |   |                         |           |   | x | x | x |   |   |
| 17 | Wu et al. (2019)          | corn, wheat, soybean meal, fish meal                        | <i>L. plantarum</i> , <i>Pa. polymyxa</i>                                                                   | x |   |                         |           | x | x | x |   |   |   |
| 18 | Huang et al. (2019)       | corn, wheat, soybean meal                                   | <i>E. faecium</i>                                                                                           |   | x | <i>Escherichia coli</i> | injection | x |   | x | x | x |   |
| 19 | Bai et al. (2013)         | corn, soybean meal, rapeseed meal, cottonseed meal          | <i>L. fermentum</i> , <i>S. cerevisiae</i>                                                                  | x |   |                         |           | x |   |   | x |   | x |
| 20 | Yang et al (2021)         | corn, bran, soybean meal, fish meal                         | <i>B. subtilis</i>                                                                                          |   | x | <i>E. tenella</i>       | oral      |   |   | x | x |   |   |
| 21 | Wang et al. (2016)        | corn, soybean meal                                          | <i>S. cerevisiae</i>                                                                                        | x | x | <i>Escherichia coli</i> | oral      | x | x |   | x | x | x |
| 22 | Chang et al. (2020)       | corn, soybean meal, corn, bran, soybean meal, rapeseed meal | <i>L. acidophilus</i> , <i>L. fermentum</i> , <i>L. casei</i> , <i>P. acidilactici</i>                      |   | x | <i>S. enterica</i>      | oral      | x |   | x | x | x |   |
| 23 | Lan et al. (2020)         | meal, rapeseed meal                                         | <i>P. pentosaceus</i>                                                                                       |   | x | <i>S. enteritidis</i>   | oral      |   | x | x |   | x |   |
| 24 | Wang et al. (2017)        | corn, soybean meal                                          | <i>E. maxima</i> , <i>E. acervulina</i> , <i>L. johnsonii</i>                                               |   | x | <i>C. perfringens</i>   | oral      |   | x |   | x |   | x |

|    |                            |                                                 |                                                                                                            |   |   |                                                                                                                           |            |   |   |   |   |   |
|----|----------------------------|-------------------------------------------------|------------------------------------------------------------------------------------------------------------|---|---|---------------------------------------------------------------------------------------------------------------------------|------------|---|---|---|---|---|
| 25 | Li et al. (2018)           | corn, soybean meal                              | <i>L. acidophilus</i>                                                                                      | x | x | <i>C. perfringens</i>                                                                                                     | oral       | x |   | x | x | x |
|    |                            | corn, soybean meal,                             |                                                                                                            |   |   |                                                                                                                           |            |   |   |   |   |   |
| 26 | Wang et al. (2017)         | fish meal                                       | <i>L. plantarum</i>                                                                                        |   | x | <i>Escherichia coli</i>                                                                                                   | oral       | x | x |   | x | x |
| 27 | Chen et al (2022)          | corn, soybean meal                              | <i>L. salivarius</i>                                                                                       |   | x | <i>S. pullorum</i> , Aflatoxin B1                                                                                         | oral, diet |   | x | x |   |   |
|    |                            |                                                 |                                                                                                            |   |   | <i>E. maxima</i> , <i>E. tenella</i> , <i>E.</i>                                                                          |            |   |   |   |   |   |
| 28 | Calik et al. (2019)        | corn, soybean meal                              | <i>B. amyloliquefaciens</i>                                                                                |   | x | <i>acervulina</i>                                                                                                         | oral       | x | x |   | x | x |
| 29 | Qiu et al. (2021)          | corn, soybean meal                              | <i>B. subtilis</i>                                                                                         | x |   |                                                                                                                           |            | x | x | x |   | x |
| 30 | Cao et al. (2019)          | corn, soybean meal                              | <i>L. plantarum</i>                                                                                        |   | x | <i>C. perfringens</i>                                                                                                     | oral       |   | x |   | x |   |
| 31 | Li et al. (2017)           | wheat, soybean meal                             | <i>B. subtilis</i>                                                                                         | x | x | <i>C. perfringens</i>                                                                                                     | oral       | x | x |   | x | x |
|    |                            |                                                 | <i>B. subtilis</i> , <i>L. casei</i> , <i>L. acidophilus</i> , <i>Bi. Thermophilum</i> , <i>E. faecium</i> |   |   |                                                                                                                           |            |   |   |   |   |   |
| 32 | Aliakbarpour et al. (2012) | corn, soybean meal                              | <i>ilum</i> , <i>E. faecium</i>                                                                            | x |   |                                                                                                                           |            | x |   | x |   | x |
|    |                            | corn, soybean meal,                             |                                                                                                            |   |   |                                                                                                                           |            |   |   |   |   |   |
| 33 | Gao et al. (2022)          | fish meal                                       | <i>L. plantarum</i>                                                                                        | x |   |                                                                                                                           |            | x |   | x |   | x |
| 34 | Hosseini et al. (2019)     | corn, soybean meal                              | <i>B. subtilis</i> , <i>B. tequilensis</i>                                                                 | x |   |                                                                                                                           |            |   | x | x |   | x |
|    |                            |                                                 |                                                                                                            |   |   | <i>C. perfringens</i> , <i>E. maxima</i> , <i>E. tenella</i> , <i>E. acervulina</i> , <i>E. mitis</i> , <i>E. praecox</i> |            |   |   |   |   |   |
| 35 | Konieczka et al (2022)     | corn, wheat, soy-bean meal                      | <i>B. licheniformis</i> , <i>B. amyloliquefaciens</i> , <i>B. subtilis</i>                                 | x | x |                                                                                                                           | oral       | x | x | x | x | x |
|    |                            | triticale, soybean meal, corn gluten meal, corn | <i>B. subtilis</i> , <i>B. licheniformis</i>                                                               |   |   |                                                                                                                           |            |   |   |   |   |   |
| 36 | Hosseini et al. (2018)     | meal                                            | <i>formis</i>                                                                                              | x |   |                                                                                                                           |            | x |   | x |   |   |
|    |                            | corn, wheat, soy-bean meal, fish meal           | <i>L. plantarum</i> , <i>Pa. polymyxa</i>                                                                  |   | x | <i>C. perfringens</i>                                                                                                     | oral       |   | x | x |   |   |
| 37 | Gong et al. (2021)         | bean meal, fish meal                            | <i>myxa</i>                                                                                                |   | x | <i>C. perfringens</i>                                                                                                     | oral       |   | x |   |   |   |
| 38 | Zhao et al (2022)          | corn, soybean meal                              | <i>B. licheniformis</i>                                                                                    |   | x | <i>C. perfringens</i>                                                                                                     | oral       | x |   | x |   |   |
|    |                            | corn, soybean meal, fish meal, rapeseed meal    |                                                                                                            |   |   |                                                                                                                           |            |   |   |   |   |   |
| 39 | Liu et al. (2022)          | meal                                            | <i>C. butyricum</i>                                                                                        | x |   |                                                                                                                           |            | x | x | x | x | x |

|    |                        |                      |                                                   |   |   |                                                                                                    |       |  |   |   |   |   |   |
|----|------------------------|----------------------|---------------------------------------------------|---|---|----------------------------------------------------------------------------------------------------|-------|--|---|---|---|---|---|
|    |                        | barley, corn, soy-   | <i>L. fermentum</i> , <i>B. coagu-</i>            |   |   |                                                                                                    |       |  |   |   |   |   |   |
| 40 | Guo et al. (2021)      | bean meal, fish meal | <i>lans</i>                                       | x | x | <i>C. perfringens</i>                                                                              | oral  |  | x |   |   | x |   |
|    |                        |                      |                                                   |   |   | <i>C. perfringens</i> , <i>E. maxima</i> ,<br><i>E. tenella</i> , <i>E. acervulina</i> , <i>E.</i> |       |  |   |   |   |   |   |
|    |                        |                      | <i>L. acidophilus</i> , <i>L. casei</i> ,         |   |   |                                                                                                    |       |  |   |   |   |   |   |
| 41 | Emami et al. (2019)    | corn, soybean meal   | <i>E. faecium</i> , <i>Bi. Bifidum</i>            |   | x | <i>mivati</i>                                                                                      | spray |  | x |   | x | x | x |
|    |                        |                      | <i>St. faecalis</i> , <i>C. butyri-</i>           |   |   |                                                                                                    |       |  |   |   |   |   |   |
|    |                        |                      | <i>cum</i> , <i>B. mesentericus</i>               |   | x | <i>S. minnesota</i>                                                                                | oral  |  | x |   |   | x |   |
| 42 | Mohammed et al. (2021) | corn                 |                                                   |   | x | <i>S. minnesota</i>                                                                                | oral  |  | x |   |   | x |   |
| 43 | Mohsin et al. (2022)   | corn, soybean meal   | <i>L. plantarum</i>                               |   | x | <i>E. tenella</i>                                                                                  | oral  |  | x |   | x |   |   |
|    |                        | corn, soybean meal,  |                                                   |   |   |                                                                                                    |       |  |   |   |   |   |   |
| 44 | Wu et al. (2018)       | corn gluten meal     | <i>L. plantarum</i>                               |   | x | <i>F. graminearum</i>                                                                              | diet  |  | x |   | x | x |   |
| 45 | Wang et al. (2022)     | corn, soybean meal   | <i>B. subtilis</i>                                |   | x | <i>S. pullorum</i>                                                                                 | oral  |  | x |   | x |   |   |
|    |                        | corn, soybean meal,  | <i>L. acidophilus</i> , <i>L. planta-</i>         |   |   |                                                                                                    |       |  |   |   |   |   |   |
| 46 | Deng et al. (2020)     | corn gluten meal     | <i>rum</i>                                        |   | x | <i>L. monocytogenes</i>                                                                            | oral  |  | x |   |   | x |   |
|    |                        | corn, soybean meal,  |                                                   |   |   |                                                                                                    |       |  |   |   |   |   |   |
| 47 | Ateya et al. (2019)    | corn gluten meal     | <i>P. acidilactici</i>                            |   | x | <i>Escherichia coli</i>                                                                            | oral  |  | x |   |   | x |   |
|    |                        | corn, soybean meal,  |                                                   |   |   |                                                                                                    |       |  |   |   |   |   |   |
| 48 | Zhang et al. (2022)    | corn gluten meal     | <i>B. amyloliquefaciens</i>                       |   | x | <i>C. perfringens</i>                                                                              | spray |  | x |   | x | x | x |
|    |                        | corn, soybean meal,  |                                                   |   |   |                                                                                                    |       |  |   |   |   |   |   |
| 49 | Dong et al. (2016)     | cottonseed meal      | <i>E. fecalis</i>                                 | x |   |                                                                                                    |       |  | x | x |   | x | x |
| 50 | Xiao et al. (2022)     | corn, soybean meal   | <i>B. methylotrophicus</i>                        | x |   |                                                                                                    |       |  | x | x |   | x | x |
|    |                        |                      | <i>L. acidophilus</i> , <i>L. ani-</i>            |   |   |                                                                                                    |       |  |   |   |   |   |   |
|    |                        |                      | <i>malis</i> , <i>L. reuteri</i> , <i>L. fer-</i> |   |   |                                                                                                    |       |  |   |   |   |   |   |
|    |                        | corn, rice, soybean  | <i>mentum</i> , <i>L. gallinarum</i> ,            |   |   |                                                                                                    |       |  |   |   |   |   |   |
| 51 | Azizi et al. (2021)    | meal                 | <i>S. cerevisiae</i>                              |   | x | <i>F. graminearum</i>                                                                              | diet  |  | x | x | x |   | x |
|    |                        |                      |                                                   |   |   | <i>C. perfringens</i> , <i>E. maxima</i> ,<br><i>E. tenella</i> , <i>E. acervulina</i> , <i>E.</i> |       |  |   |   |   |   |   |
| 52 | Emami et al. (2020)    | corn, soybean meal   | <i>B. licheniformis</i>                           | x | x | <i>mivati</i>                                                                                      | spray |  | x | x |   | x | x |

|    |                       |                    |                             |   |   |                                            |      |   |   |   |
|----|-----------------------|--------------------|-----------------------------|---|---|--------------------------------------------|------|---|---|---|
|    | Gharib-Naseri et al.  | wheat, soybean     |                             |   |   | <i>C. perfringens</i> , <i>E. maxima</i> , |      |   |   |   |
| 53 | (2020)                | meal, sorghum      | <i>B. amyloliquefaciens</i> | x | x | <i>E. acervulina</i> , <i>E. brunetti</i>  | oral | x |   | x |
| 54 | Bodinga et al. (2020) | corn, soybean meal | <i>B. subtilis</i>          |   | x | <i>C. perfringens</i>                      | oral | x | x | x |

<sup>1</sup> B, *Bacillus*; Bi, *Bifidobacterium*; C, *Clostridium*; E, *Enterococcus*; L, *Lactobacillus*; Pa, *Paenibacillus*; P, *Pediococcus*; S, *Saccharomyces*; St, *Streptococcus*.

<sup>2</sup> C, *Clostridium*; E, *Eimeria*; F, *Fusarium*; L, *Listeria*; S, *Salmonella*.

<sup>3</sup> Main energy and protein feedstuffs of basal diet.

D, duodenum; J, jejunum; I, ileum; C, caeca; BAR, gut barrier-related gene expression; IMU, gut immunity-related gene expression; HIS, histomorphology; GRO, growth performance.

**Table S2.** Descriptive statistics for predictive and response variables of jejunal and ileal gene expression (fold-change) related to barrier function and immune response in broiler chickens at week 3 and 6 of life without pathogen challenge.

| Variable <sup>1,2</sup>                       | nTreat | Mean | SEM  | Min. | Max. | Median |
|-----------------------------------------------|--------|------|------|------|------|--------|
| Jejunum, Week 3                               |        |      |      |      |      |        |
| Dietary probiotics (log <sub>10</sub> CFU/kg) | 17     | 4.8  | 1.16 | 0    | 11.0 | 6.6    |
| Dietary ME (MJ/kg)                            | 17     | 12.4 | 0.06 | 12.1 | 12.9 | 12.4   |
| Dietary CP (%)                                | 17     | 21.3 | 0.14 | 20.5 | 22.1 | 21.0   |
| <i>MUC2</i>                                   | 10     | 1.2  | 0.13 | 0.9  | 2.3  | 1.0    |
| <i>ZO1</i>                                    | 11     | 1.1  | 0.04 | 0.9  | 1.4  | 1.0    |
| <i>OCN</i>                                    | 13     | 1.4  | 0.20 | 0.9  | 3.5  | 1.0    |
| <i>CLDN1</i>                                  | 11     | 1.2  | 0.10 | 0.9  | 1.9  | 1.0    |
| Jejunum, Week 3                               |        |      |      |      |      |        |
| Dietary probiotics (log <sub>10</sub> CFU/kg) | 22     | 4.7  | 0.96 | 0    | 11.0 | 6.8    |
| Dietary ME (MJ/kg)                            | 22     | 12.4 | 0.05 | 12.1 | 12.9 | 12.3   |
| Dietary CP (%)                                | 22     | 21.3 | 0.11 | 20.5 | 22.0 | 21.0   |
| <i>IL1B</i>                                   | 11     | 1.0  | 0.04 | 0.6  | 1.1  | 1.0    |
| <i>IFNG</i>                                   | 14     | 1.0  | 0.04 | 0.8  | 1.4  | 1.0    |
| <i>TLR2</i>                                   | 11     | 1.1  | 0.12 | 0.7  | 2.1  | 1.0    |
| Jejunum, Week 6                               |        |      |      |      |      |        |
| Dietary probiotics (log <sub>10</sub> CFU/kg) | 24     | 5.8  | 0.95 | 0    | 11.0 | 8.7    |
| Dietary ME (MJ/kg)                            | 24     | 13.0 | 0.06 | 12.6 | 13.4 | 13.2   |
| Dietary CP (%)                                | 24     | 19.5 | 0.15 | 18.2 | 20.7 | 19.3   |
| <i>MUC2</i>                                   | 10     | 1.8  | 0.37 | 1.0  | 4.5  | 1.3    |
| <i>ZO1</i>                                    | 14     | 1.7  | 0.33 | 1.0  | 5.6  | 1.2    |
| <i>OCN</i>                                    | 16     | 1.4  | 0.18 | 0.6  | 3.1  | 1.0    |
| <i>CLDN1</i>                                  | 12     | 1.4  | 0.18 | 0.5  | 2.6  | 1.3    |
| Ileum, Week 3                                 |        |      |      |      |      |        |
| Dietary probiotics (log <sub>10</sub> CFU/kg) | 13     | 5.7  | 1.32 | 0    | 11.3 | 8.0    |
| Dietary ME (MJ/kg)                            | 13     | 12.3 | 0.05 | 12.1 | 12.6 | 12.2   |
| Dietary CP (%)                                | 13     | 21.5 | 0.18 | 21.0 | 22.4 | 21.0   |
| <i>MUC2</i>                                   | 10     | 2.0  | 0.64 | 0.7  | 7.5  | 1.0    |
| <i>ZO1</i>                                    | 11     | 1.2  | 0.19 | 0.1  | 2.3  | 1.0    |
| <i>OCN</i>                                    | 13     | 1.8  | 0.62 | 0.7  | 9.0  | 1.0    |
| <i>CLDN1</i>                                  | 10     | 1.3  | 0.15 | 0.7  | 2.2  | 1.0    |
| Ileum, Week 6                                 |        |      |      |      |      |        |
| Dietary probiotics (log <sub>10</sub> CFU/kg) | 19     | 6.2  | 0.99 | 0    | 10.4 | 8.5    |
| Dietary ME (MJ/kg)                            | 19     | 12.9 | 0.06 | 12.6 | 13.3 | 12.8   |
| Dietary CP (%)                                | 19     | 19.4 | 0.18 | 18.1 | 20.7 | 19.2   |
| <i>MUC2</i>                                   | 15     | 1.9  | 0.39 | 0.7  | 5.2  | 1.0    |
| <i>ZO1</i>                                    | 14     | 2.3  | 0.63 | 0.5  | 8.6  | 1.0    |
| <i>OCN</i>                                    | 16     | 1.3  | 0.17 | 0.7  | 3.4  | 1.1    |

nTreat, number of treatments mean; SEM, standard error of means; Min, minimum; Max, maximum; ME, metabolizable energy; CP, crude protein; CFU, colony-forming unit; *MUC2*, mucin-2; *ZO1*, zonula occludens-1; *OCN*, occludin; *CLDN1*, claudin-1; *IL1B*, interleukin-1beta; *TLR2*, toll-like receptor-2; *IFNG*, interferon-gamma.

<sup>2</sup>Data were calculated as log<sub>2</sub>fold change between probiotic and control treatments and then expressed in fold-change using a logarithmic scale to base 2.



**Table S3.** Descriptive statistics for predictive and response variables of jejunal and ileal histomorphology (fold-change) in broiler chickens at week 3 and 6 of life without pathogen challenge.

| Variable <sup>1,2</sup>                       | nTreat | Mean | SEM  | Min. | Max. | Median |
|-----------------------------------------------|--------|------|------|------|------|--------|
| Jejunum, Week 3                               |        |      |      |      |      |        |
| Dietary probiotics (log <sub>10</sub> CFU/kg) | 15     | 5.0  | 1.27 | 0    | 11.0 | 6.6    |
| Dietary ME (MJ/kg)                            | 15     | 12.5 | 0.07 | 12.1 | 12.9 | 12.5   |
| Dietary CP (%)                                | 15     | 21.3 | 0.19 | 19.9 | 22.1 | 21.5   |
| Villus Height                                 | 15     | 1.1  | 0.04 | 1.0  | 1.5  | 1.0    |
| Crypt Depth                                   | 15     | 1.0  | 0.04 | 0.7  | 1.3  | 1.0    |
| Villus Height/Crypt Depth                     | 15     | 1.2  | 0.08 | 0.9  | 1.9  | 1.0    |
| Jejunum, Week 6                               |        |      |      |      |      |        |
| Dietary probiotics (log <sub>10</sub> CFU/kg) | 19     | 5.9  | 1.08 | 0    | 11.0 | 9.0    |
| Dietary ME (MJ/kg)                            | 19     | 12.9 | 0.06 | 12.5 | 13.2 | 12.9   |
| Dietary CP (%)                                | 19     | 19.4 | 0.16 | 18.2 | 20.4 | 19.2   |
| Villus Height                                 | 19     | 1.1  | 0.03 | 0.9  | 1.3  | 1.0    |
| Crypt Depth                                   | 19     | 1.1  | 0.04 | 0.7  | 1.5  | 1.0    |
| Villus Height/Crypt Depth                     | 19     | 1.0  | 0.04 | 0.8  | 1.5  | 1.0    |
| Ileum, Week 3                                 |        |      |      |      |      |        |
| Dietary probiotics (log <sub>10</sub> CFU/kg) | 11     | 5.1  | 1.50 | 0    | 11.0 | 8.5    |
| Dietary ME (MJ/kg)                            | 11     | 12.4 | 0.06 | 12.1 | 12.7 | 12.4   |
| Dietary CP (%)                                | 11     | 21.6 | 0.16 | 21.0 | 22.1 | 22.0   |
| Villus Height                                 | 11     | 1.0  | 0.03 | 0.9  | 1.3  | 1.0    |
| Crypt Depth                                   | 11     | 0.9  | 0.04 | 0.6  | 1.1  | 1.0    |
| Villus Height/Crypt Depth                     | 11     | 1.1  | 0.06 | 0.9  | 1.7  | 1.0    |
| Ileum, Week 6                                 |        |      |      |      |      |        |
| Dietary probiotics (log <sub>10</sub> CFU/kg) | 17     | 6.1  | 1.14 | 0    | 11.0 | 9.0    |
| Dietary ME (MJ/kg)                            | 17     | 13.0 | 0.06 | 12.6 | 13.2 | 13.0   |
| Dietary CP (%)                                | 17     | 19.6 | 0.15 | 18.9 | 20.7 | 19.2   |
| Villus Height                                 | 17     | 1.1  | 0.04 | 0.9  | 1.5  | 1.0    |
| Crypt Depth                                   | 17     | 1.0  | 0.03 | 0.7  | 1.2  | 1.0    |
| Villus Height/Crypt Depth                     | 17     | 1.1  | 0.04 | 0.8  | 1.4  | 1.1    |

nTreat, number of treatments means; SEM, standard error of means; Min, minimum; Max, maximum; ME, metabolizable energy; CP, crude protein; CFU, colony-forming unit.

<sup>1</sup>Probiotic genera included for these response variables were *Bacillus*, *Bifidobacterium*, *Lactobacillus*, *Clostridium*, *Enterococcus*, and *Saccharomyces*.

<sup>2</sup>Data were calculated as log<sub>2</sub>fold change between probiotic and control treatments and then expressed in fold-change using a logarithmic scale to base 2.

**Table S4.** Descriptive statistics for predictors and response variables of growth performance in broiler chickens at starter, finisher, and overall periods without pathogen challenge.

| Variable <sup>1</sup>                         | nTreat | Mean  | SEM  | Min.  | Max.  | Median |
|-----------------------------------------------|--------|-------|------|-------|-------|--------|
| Starter (1-3 Weeks)                           |        |       |      |       |       |        |
| Dietary probiotics (log <sub>10</sub> CFU/kg) | 33     | 5.6   | 0.80 | 0     | 11.0  | 8.5    |
| Dietary ME (MJ/kg)                            | 33     | 12.4  | 0.03 | 12.1  | 12.8  | 12.5   |
| Dietary CP (%)                                | 33     | 21.5  | 0.13 | 21.0  | 23.0  | 21.1   |
| ADFI (g)                                      | 33     | 50.2  | 1.52 | 35.9  | 65.3  | 49.6   |
| ADG (g)                                       | 30     | 33.7  | 0.82 | 25.8  | 44.6  | 33.7   |
| FCR                                           | 33     | 1.5   | 0.03 | 1.1   | 1.8   | 1.4    |
| Finisher (4-6 Weeks)                          |        |       |      |       |       |        |
| Dietary probiotics (log <sub>10</sub> CFU/kg) | 29     | 5.7   | 0.86 | 0     | 11.0  | 8.5    |
| Dietary ME (MJ/kg)                            | 29     | 12.8  | 0.04 | 12.5  | 13.2  | 12.8   |
| Dietary CP (%)                                | 29     | 19.5  | 0.11 | 18.9  | 20.7  | 19.2   |
| ADFI (g)                                      | 29     | 151.8 | 4.69 | 105.9 | 199.7 | 153.0  |
| ADG (g)                                       | 26     | 77.6  | 2.98 | 51.0  | 107.2 | 77.2   |
| FCR                                           | 29     | 2.0   | 0.04 | 1.5   | 2.3   | 1.9    |
| Overall (1-6 Weeks)                           |        |       |      |       |       |        |
| Dietary probiotics (log <sub>10</sub> CFU/kg) | 32     | 5.7   | 0.80 | 0     | 11.0  | 8.5    |
| Dietary ME (MJ/kg)                            | 32     | 12.7  | 0.03 | 12.3  | 13.0  | 12.6   |
| Dietary CP (%)                                | 32     | 20.6  | 0.11 | 19.7  | 21.5  | 20.3   |
| ADFI (g)                                      | 32     | 100.5 | 2.79 | 71.4  | 132.0 | 99.5   |
| ADG (g)                                       | 26     | 56.5  | 1.57 | 42.1  | 71.3  | 56.7   |
| FCR                                           | 32     | 1.7   | 0.02 | 1.4   | 2.0   | 1.7    |

nTreat, number of treatments means included; SEM, standard error of means; Min, minimum; Max, maximum; ME, metabolizable energy; CP, crude protein; CFU, colony-forming unit; ADFI, average daily feed intake; ADG, average daily weight gain; FCR, feed conversion ratio.

<sup>1</sup>Probiotic genera included for these response variables were *Bacillus*, *Bifidobacterium*, *Lactobacillus*, *Clostridium*, *Enterococcus*, and *Saccharomyces*.

**Table S5.** Descriptive statistics for predictive and response variables of jejunal, ileal, and caecal gene expression (fold-change) related to barrier function in broiler chickens from week 2 to 5 with pathogen challenge.

| Variable <sup>1-3</sup>                       | nTreat | Mean | SEM  | Min. | Max. | Median |
|-----------------------------------------------|--------|------|------|------|------|--------|
| Jejunum, Week 2                               |        |      |      |      |      |        |
| Dietary probiotics (log <sub>10</sub> CFU/kg) | 18     | 4.9  | 1.07 | 0    | 10.7 | 8.2    |
| Days post-infection                           | 18     | 6.6  | 0.78 | 3.0  | 12.0 | 6.0    |
| Dietary ME (MJ/kg)                            | 18     | 12.5 | 0.05 | 12.1 | 12.8 | 12.6   |
| Dietary CP (%)                                | 18     | 21.8 | 0.24 | 20.0 | 23.0 | 21.8   |
| ZO1                                           | 14     | 1.1  | 0.04 | 0.7  | 1.3  | 1.0    |
| OCLN                                          | 16     | 1.6  | 0.62 | 0.6  | 10.8 | 1.0    |
| CLDN1                                         | 14     | 1.1  | 0.17 | 0.6  | 3.3  | 1.0    |
| CLDN3                                         | 10     | 1.5  | 0.17 | 1.0  | 2.3  | 1.2    |
| Jejunum, Week 3                               |        |      |      |      |      |        |
| Dietary probiotics (log <sub>10</sub> CFU/kg) | 19     | 5.3  | 1.07 | 0    | 10.7 | 8.7    |
| Days post-infection                           | 19     | 7.0  | 0.59 | 4.0  | 12.0 | 7.0    |
| Dietary ME (MJ/kg)                            | 19     | 12.5 | 0.06 | 12.1 | 12.9 | 12.4   |
| Dietary CP (%)                                | 19     | 20.9 | 0.12 | 20.0 | 22.0 | 21.0   |
| MUC2                                          | 10     | 1.2  | 0.19 | 0.7  | 2.8  | 1.0    |
| ZO1                                           | 17     | 1.2  | 0.08 | 0.9  | 2.0  | 1.0    |
| OCLN                                          | 17     | 1.3  | 0.14 | 0.7  | 3.1  | 1.0    |
| CLDN1                                         | 14     | 1.6  | 0.45 | 0.4  | 7.3  | 1.0    |
| Jejunum, Week 4                               |        |      |      |      |      |        |
| Dietary probiotics (log <sub>10</sub> CFU/kg) | 12     | 5.0  | 1.28 | 0    | 9.2  | 7.7    |
| Days post-infection                           | 12     | 12.0 | 1.69 | 7.0  | 21.0 | 10.0   |
| Dietary ME (MJ/kg)                            | 12     | 12.6 | 0.07 | 12.4 | 13.0 | 12.5   |
| Dietary CP (%)                                | 12     | 20.0 | 0.28 | 19.0 | 21.2 | 19.8   |
| ZO1                                           | 12     | 1.3  | 0.10 | 0.9  | 2.0  | 1.1    |
| OCLN                                          | 12     | 1.3  | 0.20 | 0.6  | 2.8  | 1.0    |
| Jejunum, Week 5                               |        |      |      |      |      |        |
| Dietary probiotics (log <sub>10</sub> CFU/kg) | 13     | 6.9  | 1.10 | 0    | 9.6  | 9.0    |
| Days post-infection                           | 13     | 28.8 | 2.26 | 17.0 | 34.0 | 34.0   |
| Dietary ME (MJ/kg)                            | 13     | 12.7 | 0.03 | 12.5 | 12.8 | 12.8   |
| Dietary CP (%)                                | 13     | 19.0 | 0.02 | 19.0 | 19.2 | 19.0   |
| MUC2                                          | 13     | 1.1  | 0.20 | 0.2  | 2.7  | 1.0    |
| Ileum, Week 3                                 |        |      |      |      |      |        |
| Dietary probiotics (log <sub>10</sub> CFU/kg) | 16     | 5.6  | 1.12 | 0    | 9.7  | 8.4    |
| Days post-infection                           | 16     | 14.3 | 1.62 | 4.0  | 20.0 | 16.0   |
| Dietary ME (MJ/Kg)                            | 16     | 12.3 | 0.04 | 12.1 | 12.6 | 12.2   |
| Dietary CP (%)                                | 16     | 21.4 | 0.13 | 21.0 | 22.4 | 21.2   |
| ZO1                                           | 16     | 1.3  | 0.15 | 0.4  | 2.7  | 1.0    |
| OCLN                                          | 16     | 1.3  | 0.16 | 0.4  | 2.7  | 1.0    |
| CLDN1                                         | 11     | 1.0  | 0.14 | 0.5  | 2.1  | 1.0    |

|                                               |    |      |      |      |      |      |
|-----------------------------------------------|----|------|------|------|------|------|
| Ileum, Week 4                                 |    |      |      |      |      |      |
| Dietary probiotics (log <sub>10</sub> CFU/kg) | 11 | 5.1  | 1.50 | 0    | 11.3 | 8.0  |
| Days post-infection                           | 11 | 11.6 | 0.85 | 8.0  | 14.0 | 14.0 |
| Dietary ME (MJ/kg)                            | 11 | 12.8 | 0.15 | 12.1 | 13.2 | 13.2 |
| Dietary CP (%)                                | 11 | 20.5 | 0.17 | 20.0 | 21.2 | 20.0 |
| ZO1                                           | 11 | 1.2  | 0.11 | 1.0  | 2.2  | 1.1  |
| OCN                                           | 11 | 1.3  | 0.18 | 0.8  | 2.9  | 1.0  |
| CLDN1                                         | 11 | 1.3  | 0.21 | 0.5  | 2.7  | 1.0  |
| Caeca, Week 4                                 |    |      |      |      |      |      |
| Dietary probiotics (log <sub>10</sub> CFU/kg) | 10 | 4.6  | 1.29 | 0    | 8.7  | 6.5  |
| Days post-infection                           | 10 | 7.6  | 0.16 | 7.0  | 8.0  | 8.0  |
| Dietary ME (MJ/Kg)                            | 10 | 12.7 | 0.08 | 12.6 | 13.2 | 12.6 |
| Dietary CP (%)                                | 10 | 19.2 | 0.13 | 19.0 | 20.0 | 19.0 |
| ZO1                                           | 10 | 2.6  | 1.05 | 1.0  | 11.9 | 1.5  |

nTreat, number of treatments means; SEM, standard error of means; Min, minimum; Max, maximum; ME, metabolizable energy; CP, crude protein; CFU, colony-forming unit; MUC2, mucin-2; ZO1, zonula occludens-1; OCN, occludin; CLDN1, -3, claudin-1, -3.

<sup>1</sup>Probiotic genera included for these response variables were *Bacillus*, *Bifidobacterium*, *Lactobacillus*, *Paenibacillus*, *Clostridium*, *Enterococcus*, *Pediococcus*, and *Saccharomyces*.

<sup>2</sup>Pathogens included for these response variables were *E. coli*, *C. perfringens*, *S. enteritidis*, *E. maxima*, *E. tenella*, *E. aceroulina*, *E. mivati*, *E. brunetti*, *E. mitis*, *E. praecox*, *F. graminearum*, *S. pullorum*, and Aflatoxin B1.

<sup>3</sup>Data were calculated as log<sub>2</sub>fold change between probiotic and control treatments and then expressed in fold-change using a logarithmic scale to base 2.

**Table S6.** Descriptive statistics for predictive and response variables of jejunal, ileal, and caecal gene expression (fold-change) related to immune response in broiler chickens from week 2 to 4 of life with pathogen challenge.

| Variable <sup>1-3</sup>                       | nTreat | Mean | SEM  | Min. | Max. | Median |
|-----------------------------------------------|--------|------|------|------|------|--------|
| Jejunum, Week 2                               |        |      |      |      |      |        |
| Dietary probiotics (log <sub>10</sub> CFU/kg) | 14     | 4.8  | 1.15 | 0    | 8.9  | 8.2    |
| Days post-infection                           | 14     | 7.0  | 0.96 | 3.0  | 12.0 | 6.0    |
| Dietary ME (MJ/kg)                            | 14     | 12.4 | 0.05 | 12.1 | 12.6 | 12.5   |
| Dietary CP (%)                                | 14     | 21.9 | 0.21 | 21.0 | 23.0 | 21.8   |
| <i>IL1B</i>                                   | 10     | 1.0  | 0.03 | 0.7  | 1.2  | 1.0    |
| <i>IL10</i>                                   | 14     | 1.2  | 0.20 | 0.2  | 2.9  | 1.0    |
| <i>IFNG</i>                                   | 10     | 0.9  | 0.06 | 0.5  | 1.0  | 0.9    |
| Jejunum, Week 3                               |        |      |      |      |      |        |
| Dietary probiotics (log <sub>10</sub> CFU/kg) | 25     | 5.2  | 0.95 | 0    | 10.7 | 8.5    |
| Days post-infection                           | 25     | 8.2  | 0.85 | 4.0  | 20.0 | 7.0    |
| Dietary ME (MJ/kg)                            | 25     | 12.4 | 0.05 | 12.1 | 12.9 | 12.4   |
| Dietary CP (%)                                | 25     | 21.0 | 0.13 | 20.0 | 22.0 | 21.0   |
| <i>IL1B</i>                                   | 17     | 0.8  | 0.07 | 0.2  | 1.3  | 1.0    |
| <i>IL6</i>                                    | 12     | 0.9  | 0.08 | 0.4  | 1.1  | 1.0    |
| <i>IL10</i>                                   | 13     | 1.7  | 0.33 | 0.5  | 4.6  | 1.0    |
| <i>IFNG</i>                                   | 18     | 0.9  | 0.07 | 0.4  | 1.5  | 1.0    |
| <i>TNFA</i>                                   | 10     | 0.9  | 0.06 | 0.6  | 1.2  | 1.0    |
| Jejunum, Week 4                               |        |      |      |      |      |        |
| Dietary probiotics (log <sub>10</sub> CFU/kg) | 14     | 5.1  | 1.23 | 0    | 10.0 | 7.7    |
| Days post-infection                           | 14     | 11.8 | 1.04 | 7.0  | 17.0 | 13.5   |
| Dietary ME (MJ/kg)                            | 14     | 12.7 | 0.09 | 12.4 | 13.2 | 12.6   |
| Dietary CP (%)                                | 14     | 19.7 | 0.21 | 19.0 | 21.0 | 19.5   |
| <i>IL1B</i>                                   | 10     | 1.4  | 0.14 | 1.0  | 2.2  | 1.2    |
| <i>IFNG</i>                                   | 14     | 1.2  | 0.13 | 0.6  | 2.4  | 1.0    |
| Ileum, Week 2                                 |        |      |      |      |      |        |
| Dietary probiotics (log <sub>10</sub> CFU/kg) | 12     | 4.6  | 1.39 | 0    | 9.7  | 4.1    |
| Days post-infection                           | 12     | 3.5  | 0.77 | 1.0  | 7.0  | 2.5    |
| Dietary ME (MJ/kg)                            | 12     | 12.6 | 0.12 | 12.1 | 13.2 | 12.8   |
| Dietary CP (%)                                | 12     | 21.6 | 0.18 | 20.9 | 22.1 | 21.6   |
| <i>IFNG</i>                                   | 10     | 1.0  | 0.16 | 0.4  | 2.2  | 1.0    |
| <i>TLR4</i>                                   | 10     | 0.9  | 0.10 | 0.5  | 1.6  | 1.0    |
| Ileum, Week 3                                 |        |      |      |      |      |        |
| Dietary probiotics (log <sub>10</sub> CFU/kg) | 12     | 5.1  | 1.32 | 0    | 9.7  | 8.0    |
| Days post-infection                           | 12     | 13.7 | 2.27 | 4.0  | 20.0 | 20.0   |
| Dietary ME (MJ/kg)                            | 12     | 12.3 | 0.05 | 12.1 | 12.5 | 12.2   |
| Dietary CP (%)                                | 12     | 21.4 | 0.17 | 21.0 | 22.4 | 21.1   |
| <i>IL10</i>                                   | 10     | 1.1  | 0.11 | 0.7  | 2.0  | 1.0    |
| <i>IFNG</i>                                   | 12     | 0.9  | 0.05 | 0.6  | 1.1  | 0.9    |

|                                               |    |      |      |      |      |      |
|-----------------------------------------------|----|------|------|------|------|------|
| Ileum, Week 4                                 |    |      |      |      |      |      |
| Dietary probiotics (log <sub>10</sub> CFU/kg) | 10 | 5.9  | 1.63 | 0    | 11.3 | 9.0  |
| Days post-infection                           | 10 | 17.3 | 2.60 | 8.0  | 27.0 | 17.0 |
| Dietary ME (MJ/kg)                            | 10 | 12.4 | 0.11 | 12.1 | 12.8 | 12.1 |
| Dietary CP (%)                                | 10 | 19.8 | 0.41 | 19.0 | 22.1 | 19.0 |
| TNFA                                          | 10 | 0.8  | 0.09 | 0.2  | 1.0  | 1.0  |
| Caeca, Week 2                                 |    |      |      |      |      |      |
| Dietary probiotics (log <sub>10</sub> CFU/kg) | 22 | 5.5  | 1.04 | 0    | 12.4 | 8.0  |
| Days post-infection                           | 22 | 3.4  | 0.60 | 0.2  | 7.0  | 3.0  |
| Dietary ME (MJ/kg)                            | 22 | 12.0 | 0.10 | 11.4 | 12.8 | 12.1 |
| Dietary CP (%)                                | 22 | 20.8 | 0.25 | 19.2 | 23.0 | 21.0 |
| IL6                                           | 18 | 0.9  | 0.07 | 0.1  | 1.5  | 1.0  |
| IL8                                           | 10 | 0.9  | 0.19 | 0.1  | 2.1  | 1.0  |
| IL10                                          | 10 | 2.4  | 0.42 | 1.0  | 4.7  | 2.5  |

nTreat, number of treatments means; SEM, standard error of means; Min, minimum; Max, maximum; ME, metabolizable energy; CP, crude protein; CFU, colony-forming unit; IL6, -8, -10, -1B, interleukin-6, -8, -10, -1B; TLR4, toll-like receptor -4; IFNG, interferon-gamma; TNFA, tumor necrosis factor-alpha.

<sup>1</sup>Probiotic genera included for these response variables were *Bacillus*, *Bifidobacterium*, *Lactobacillus*, *Paenibacillus*, *Clostridium*, *Enterococcus*, *Pediococcus*, *Streptococcus*, and *Saccharomyces*.

<sup>2</sup>Pathogens included for these response variables were *E. coli*, *C. perfringens*, *S. enteritidis*, *E. maxima*, *E. tenella*, *E. acervulina*, *E. mivati*, *E. brunetti*, *F. graminearum*, *S. minnesota*, and *L. monocytogenes*.

<sup>3</sup>Data were calculated as log<sub>2</sub>fold change between probiotic and control treatments and then expressed in fold-change using a logarithmic scale to base 2.

**Table S7.** Descriptive statistics for predictive and response variables of duodenal, jejunal and ileal histomorphology (fold-change) in broiler chickens at week 2, 3 and 5 of life with pathogen challenge.

| Variable <sup>1-3</sup>                       | nTreat | Mean | SEM  | Min. | Max. | Median |
|-----------------------------------------------|--------|------|------|------|------|--------|
| Duodenum, Week 5                              |        |      |      |      |      |        |
| Dietary probiotics (log <sub>10</sub> CFU/kg) | 15     | 7.2  | 0.97 | 0    | 9.4  | 9.0    |
| Days post-infection                           | 15     | 32.0 | 1.07 | 24.0 | 34.0 | 34.0   |
| Dietary ME (MJ/kg)                            | 15     | 12.8 | 0.02 | 12.8 | 13.0 | 12.8   |
| Dietary CP (%)                                | 15     | 19.2 | 0.11 | 19.0 | 20.0 | 19.0   |
| Villus Height                                 | 15     | 1.1  | 0.02 | 1.0  | 1.3  | 1.1    |
| Crypt Depth                                   | 15     | 1.1  | 0.03 | 0.8  | 1.2  | 1.0    |
| Villus Height/Crypt Depth                     | 15     | 1.0  | 0.03 | 0.9  | 1.3  | 1.0    |
| Jejunum, Week 2                               |        |      |      |      |      |        |
| Dietary probiotics (log <sub>10</sub> CFU/kg) | 11     | 5.2  | 1.50 | 0    | 10.7 | 8.7    |
| Days post-infection                           | 11     | 5.2  | 0.48 | 3.0  | 7.0  | 5.0    |
| Dietary ME (MJ/kg)                            | 11     | 12.4 | 0.09 | 12.1 | 12.8 | 12.4   |
| Dietary CP (%)                                | 11     | 21.2 | 0.25 | 20.0 | 22.1 | 21.0   |
| Villus Height                                 | 11     | 1.0  | 0.04 | 0.9  | 1.4  | 1.0    |
| Crypt Depth                                   | 11     | 0.9  | 0.03 | 0.7  | 1.0  | 1.0    |
| Villus Height/Crypt Depth                     | 11     | 1.1  | 0.08 | 1.0  | 1.8  | 1.0    |
| Jejunum, Week 3                               |        |      |      |      |      |        |
| Dietary probiotics (log <sub>10</sub> CFU/kg) | 17     | 5.3  | 1.12 | 0    | 10.7 | 8.2    |
| Days post-infection                           | 17     | 9.8  | 1.34 | 4.0  | 20.0 | 7.0    |
| Dietary ME (MJ/kg)                            | 17     | 12.3 | 0.03 | 12.1 | 12.5 | 12.3   |
| Dietary CP (%)                                | 17     | 21.1 | 0.12 | 20.0 | 22.0 | 21.0   |
| Villus Height                                 | 17     | 1.1  | 0.04 | 0.9  | 1.5  | 1.0    |
| Crypt Depth                                   | 17     | 1.0  | 0.03 | 0.7  | 1.1  | 1.0    |
| Villus Height/Crypt Depth                     | 17     | 1.2  | 0.07 | 1.0  | 2.2  | 1.1    |
| Jejunum, Week 5                               |        |      |      |      |      |        |
| Dietary probiotics (log <sub>10</sub> CFU/kg) | 17     | 6.9  | 0.96 | 0    | 9.4  | 9.0    |
| Days post-infection                           | 17     | 30.6 | 1.35 | 20.0 | 34.0 | 34.0   |
| Dietary ME (MJ/kg)                            | 17     | 12.8 | 0.03 | 12.6 | 13.0 | 12.8   |
| Dietary CP (%)                                | 17     | 19.2 | 0.09 | 19.0 | 20.0 | 19.0   |
| Villus Height                                 | 17     | 1.0  | 0.02 | 0.9  | 1.2  | 1.0    |
| Crypt Depth                                   | 17     | 1.0  | 0.03 | 0.7  | 1.1  | 1.0    |
| Villus Height/Crypt Depth                     | 17     | 1.1  | 0.04 | 0.8  | 1.4  | 1.1    |
| Ileum, Week 3                                 |        |      |      |      |      |        |
| Dietary probiotics (log <sub>10</sub> CFU/kg) | 13     | 5.5  | 1.26 | 0    | 9.7  | 8.5    |
| Days post-infection                           | 13     | 10.3 | 1.73 | 4.0  | 20.0 | 7.0    |
| Dietary ME (MJ/kg)                            | 13     | 12.3 | 0.04 | 12.1 | 12.5 | 12.3   |
| Dietary CP (%)                                | 13     | 21.2 | 0.10 | 21.0 | 22.0 | 21.1   |

|                                               |    |      |      |      |      |      |
|-----------------------------------------------|----|------|------|------|------|------|
| Villus Height                                 | 13 | 1.0  | 0.02 | 1.0  | 1.2  | 1.0  |
| Crypt Depth                                   | 13 | 1.0  | 0.04 | 0.9  | 1.4  | 1.0  |
| Villus Height/Crypt Depth                     | 13 | 1.0  | 0.02 | 0.9  | 1.2  | 1.0  |
| Ileum, Week 5                                 |    |      |      |      |      |      |
| Dietary probiotics (log <sub>10</sub> CFU/kg) | 15 | 7.2  | 0.97 | 0    | 9.4  | 9.0  |
| Days post-infection                           | 15 | 32.0 | 1.07 | 24.0 | 34.0 | 34.0 |
| Dietary ME (MJ/kg)                            | 15 | 12.8 | 0.02 | 12.8 | 13.0 | 12.8 |
| Dietary CP (%)                                | 15 | 19.2 | 0.11 | 19.0 | 20.0 | 19.0 |
| Villus Height                                 | 15 | 1.0  | 0.03 | 0.8  | 1.2  | 1.0  |
| Crypt Depth                                   | 15 | 1.1  | 0.03 | 0.9  | 1.3  | 1.1  |
| Villus Height/Crypt Depth                     | 15 | 0.9  | 0.03 | 0.7  | 1.1  | 1.0  |

nTreat, number of treatments means; SEM, standard error of means; Min, minimum; Max, maximum; ME, metabolizable energy; CP, crude protein; CFU, colony-forming unit.

<sup>1</sup>Probiotic genera included for these response variables were *Bacillus*, *Lactobacillus*, *Enterococcus*, and *Saccharomyces*.

<sup>2</sup>Pathogens included for these response variables were *E. coli*, *C. perfringens*, *S. enteritidis*, *E. maxima*, *E. tenella*, *E. acervulina*, *E. mitis*, *E. praecox*, and *F. graminearum*.

<sup>3</sup>Data were calculated as log<sub>2</sub>fold change between probiotic and control treatments and then expressed in fold-change using a logarithmic scale to base 2.



**Table S8.** Descriptive statistics for predictors and response variables of growth performance in broiler chickens at starter, finisher, and overall periods with pathogen challenge.

| Variable <sup>1,2</sup>                       | nTreat | Mean  | SEM   | Min.  | Max.  | Median |
|-----------------------------------------------|--------|-------|-------|-------|-------|--------|
| Starter (1-3 Weeks)                           |        |       |       |       |       |        |
| Dietary probiotics (log <sub>10</sub> CFU/kg) | 22     | 5.5   | 1.00  | 0     | 9.7   | 9.0    |
| Days post-infection                           | 22     | 10.8  | 1.00  | 5.0   | 20.0  | 10.0   |
| Dietary ME (MJ/kg)                            | 22     | 12.4  | 0.04  | 12.1  | 12.7  | 12.4   |
| Dietary CP (%)                                | 22     | 21.1  | 0.05  | 21.0  | 21.8  | 21.0   |
| ADFI (g)                                      | 22     | 52.6  | 1.57  | 40.6  | 63.3  | 52.3   |
| ADG (g)                                       | 22     | 36.2  | 1.46  | 28.4  | 50.2  | 33.2   |
| FCR                                           | 22     | 1.5   | 0.04  | 1.1   | 1.9   | 1.4    |
| Finisher (4-6 Weeks)                          |        |       |       |       |       |        |
| Dietary probiotics (log <sub>10</sub> CFU/kg) | 13     | 5.0   | 1.33  | 0     | 9.6   | 9.0    |
| Days post-infection                           | 13     | 33.2  | 1.50  | 27.0  | 41.0  | 33.0   |
| Dietary ME (MJ/kg)                            | 13     | 12.7  | 0.05  | 12.5  | 13.0  | 12.8   |
| Dietary CP (%)                                | 13     | 19.3  | 0.10  | 19.0  | 19.8  | 19.0   |
| ADFI (g)                                      | 13     | 149.8 | 11.04 | 108.2 | 219.4 | 142.7  |
| ADG (g)                                       | 13     | 72.1  | 7.54  | 31.7  | 114.3 | 80.7   |
| FCR                                           | 13     | 2.0   | 0.09  | 1.7   | 2.8   | 1.9    |
| Overall (1-6 Weeks)                           |        |       |       |       |       |        |
| Dietary probiotics (log <sub>10</sub> CFU/kg) | 17     | 4.8   | 1.13  | 0     | 9.6   | 8.1    |
| Days post-infection                           | 17     | 34.9  | 1.38  | 27.0  | 41.0  | 36.0   |
| Dietary ME (MJ/kg)                            | 17     | 12.7  | 0.06  | 12.4  | 13.0  | 12.5   |
| Dietary CP (%)                                | 17     | 20.3  | 0.08  | 19.9  | 20.8  | 20.1   |
| ADFI (g)                                      | 17     | 95.6  | 2.78  | 75.6  | 119.5 | 93.8   |
| ADG (g)                                       | 17     | 57.0  | 3.26  | 31.7  | 75.7  | 55.2   |
| FCR                                           | 17     | 1.7   | 0.06  | 1.4   | 2.3   | 1.7    |

nTreat, number of treatments means; SEM, standard error of means; Min, minimum; Max, maximum; ME, metabolizable energy; CP, crude protein; CFU, colony-forming unit; ADFI, average daily feed intake; ADG, average daily weight gain; FCR, feed conversion ratio.

<sup>1</sup>Probiotic genera included for these response variables were *Bacillus*, *Bifidobacterium*, *Lactobacillus*, *Enterococcus*, and *Saccharomyces*.

<sup>2</sup>Pathogens included for these response variables were *E. coli*, *C. perfringens*, *S. enteritidis*, *E. maxima*, *E. tenella*, *E. acervulina*, *E. mivati*, *E. mitis*, and *E. praecox*.

## References

- Aliakbarpour, H.R.; Chamani, M.; Rahimi, G.; Sadeghi, A.A.; Qujeq, D. The *Bacillus subtilis* and lactic acid bacteria probiotics influences intestinal mucin gene expression, histomorphology and growth performance in broilers. *Asian-Australasian J. Anim. Sci.* **2012**, *25*, 1285–1293, doi:10.5713/ajas.2012.12110.
- Ateya, A.I.; Arafat, N.; Saleh, R.M.; Ghanem, H.M.; Naguib, D.; Radwan, H.A.; Elseady, Y.Y. Intestinal gene expressions in broiler chickens infected with *Escherichia coli* and dietary supplemented with probiotic, acidifier and synbiotic. *Vet. Res. Commun.* **2019**, *43*, 131–142, doi:10.1007/s11259-019-09753-z.
- Azizi, T.; Daneshyar, M.; Allymehr, M.; Tukmechi, A.; Khalilvandi Behroozyar, H.; Shalizar Jalali, A. Combination of *Lactobacillus* species and yeast ameliorates adverse effect of deoxynivalenol contaminated diet on immune system, gut morphology and jejunal gene expression in broiler chickens. *Ital. J. Anim. Sci.* **2021**, *20*, 59–70, doi:10.1080/1828051X.2020.1865845.
- Bai, S.P.; Wu, A.M.; Ding, X.M.; Lei, Y.; Bai, J.; Zhang, K.Y.; Chio, J.S. Effects of probiotic-supplemented diets on growth performance and intestinal immune characteristics of broiler chickens. *Poult. Sci.* **2013**, *92*, 663–670, doi:https://doi.org/10.3382/ps.2012-02813.
- Bilal, M.; Si, W.; Barbe, F.; Chevaux, E.; Sienkiewicz, O.; Zhao, X. Effects of novel probiotic strains of *Bacillus pumilus* and *Bacillus subtilis* on production, gut health, and immunity of broiler chickens raised under suboptimal conditions. *Poult. Sci.* **2021**, *100*, 100871, doi:10.1016/j.psj.2020.11.048.
- Bodinga, B.M.; Hayat, K.; Liu, X.; Zhou, J.; Yang, X.; Ismaila, A.; Soomro, R.N.; Ren, Z.; Zhang, W.; Yang, X.J. Effects of *Bacillus Subtilis* DSM 32315 on immunity, nutrient transporters and functional diversity of cecal microbiome of broiler chickens in necrotic enteritis challenge. *J. World's Poult. Res.* **2020**, *10*, 527–544, doi:10.36380/jwpr.2020.61.
- Calik, A.; Omara, I.I.; White, M.B.; Li, W.; Dalloul, R.A. Effects of dietary direct fed microbial supplementation on performance, intestinal morphology and immune response of broiler chickens challenged with coccidiosis. *Front. Vet. Sci.* **2019**, *6*, 463, doi:10.3389/fvets.2019.00463.
- Cao, L.; Wu, X.H.; Bai, Y.L.; Wu, X.Y.; Gu, S.B. Anti-inflammatory and antioxidant activities of probiotic powder containing *Lactobacillus plantarum* 1.2567 in necrotic enteritis model of broiler chickens. *Livest. Sci.* **2019**, *223*, 157–163, doi:10.1016/j.livsci.2019.03.009.
- Chang, C.H.; Teng, P.Y.; Lee, T.T.; Yu, B. Effects of multi-strain probiotic supplementation on intestinal microbiota, tight junctions, and inflammation in young broiler chickens challenged with *Salmonella enterica* subsp. *enterica*. *Asian-Australasian J. Anim. Sci.* **2020**, *33*, 1797–1808, doi:10.5713/ajas.19.0427.
- Chaudhari, A.A.; Lee, Y.; Lillehoj, H.S. Beneficial effects of dietary supplementation of *Bacillus* strains on growth performance and gut health in chickens with mixed coccidiosis infection. *Vet. Parasitol.* **2020**, *277*, 109009, doi:https://doi.org/10.1016/j.vetpar.2019.109009.
- Chen, X.; Ishfaq, M.; Wang, J. Effects of *Lactobacillus salivarius* supplementation on the growth performance, liver function, meat quality, immune responses and *Salmonella Pullorum* infection resistance of broilers challenged with Aflatoxin B1. *Poult. Sci.* **2022**, *101*, doi:10.1016/j.psj.2021.101651.
- Deng, Q.; Shi, H.; Luo, Y.; Zhao, H.; Liu, N. Effect of dietary *Lactobacilli* mixture on *Listeria monocytogenes* infection and virulence property in broilers. *Poult. Sci.* **2020**, *99*, 3655–3662, doi:10.1016/j.psj.2020.03.058.
- Dong, Z.L.; Wang, Y.W.; Song, D.; Hou, Y.J.; Wang, W.W.; Qi, W.T.; Yun, T.T.; Li, A.K. The effects of dietary supplementation of pre-microencapsulated *Enterococcus fecalis* and the extract of *Camellia oleifera* seed on growth performance, intestinal morphology, and intestinal mucosal immune functions in broiler chickens. *Anim. Feed Sci. Technol.* **2016**, *212*, 42–51, doi:https://doi.org/10.1016/j.anifeedsci.2015.11.014.
- Emami, N.K.; Calik, A.; White, M.B.; Kimminau, E.A.; Dalloul, R.A. Effect of probiotics and multi-component feed additives on microbiota, gut barrier and immune responses in broiler chickens during subclinical necrotic enteritis. *Front. Vet. Sci.* **2020**, *7*, 972.
- Emami, N.K.; Calik, A.; White, M.B.; Young, M.; Dalloul, R.A. Necrotic enteritis in broiler chickens: the role of tight junctions and

- mucosal immune responses in alleviating the effect of the disease. *Microorganisms* **2019**, *7*, 231, doi:10.3390/microorganisms7080231.
- Gao, J.; Wang, R.; Liu, J.; Wang, W.; Chen, Y.; Cai, W. Effects of novel microecologies combined with traditional Chinese medicine and probiotics on growth performance and health of broilers. *Poult. Sci.* **2022**, *101*, 101412, doi:10.1016/j.psj.2021.101412.
- Gharib-Naseri, K.; de Paula Dorigam, J.C.; Doranalli, K.; Kheravii, S.; Swick, R.A.; Choct, M.; Wu, S.B. Modulations of genes related to gut integrity, apoptosis, and immunity underlie the beneficial effects of *Bacillus amyloliquefaciens* CECT 5940 in broilers fed diets with different protein levels in a necrotic enteritis challenge model. *J. Anim. Sci. Biotechnol.* **2020**, *11*, 1–13, doi:10.1186/s40104-020-00508-4.
- Gong, L.; Wang, B.; Zhou, Y.; Tang, L.; Zeng, Z.; Zhang, H.; Li, W. Protective effects of *Lactobacillus plantarum* 16 and *Paenibacillus polymyxa* 10 against *Clostridium perfringens* infection in broilers. *Front. Immunol.* **2021**, *11*, 1–12, doi:10.3389/fimmu.2020.628374.
- Guo, S.; Xi, Y.; Xia, Y.; Wu, T.; Zhao, D.; Zhang, Z.; Ding, B. Dietary *Lactobacillus fermentum* and *Bacillus coagulans* supplementation modulates intestinal immunity and microbiota of broiler chickens challenged by *Clostridium perfringens*. *Front. Vet. Sci.* **2021**, *8*, doi:10.3389/fvets.2021.680742.
- He, T.; Long, S.; Mahfuz, S.; Wu, D.; Wang, X.; Wei, X.; Piao, X. Effects of probiotics as antibiotics substitutes on growth performance, serum biochemical parameters, intestinal morphology, and barrier function of broilers. *Animals* **2019**, *9*, doi:10.3390/ani9110985.
- Hosseini, N.G.; Modarressi, M.H.; Mousavi, S.N.; Ebrahimi, M.T. Effects of indigenous spore-forming probiotic as feed supplement on performance and safety in broilers. *J. Hell. Vet. Med. Soc.* **2019**, *70*, 1841–1850, doi:10.12681/jhvms.22234.
- Hosseini, S.M.; Chamani, M.; Mousavi, S.N.; Hosseini, S.A.; Sadeghi, A.A. Growth performance, mucin2 gene expression, morphology of small intestine and intestinal lactobacillus population of broiler chicks fed with triticale-based diets: Effects of dietary physical form and dietary inclusion of enzyme and probiotic. *Kafkas Univ. Vet. Fak. Derg.* **2018**, *24*, 203–210, doi:10.9775/kvfd.2017.18629.
- Huang, L.; Luo, L.; Zhang, Y.; Wang, Z.; Xia, Z. Effects of the dietary probiotic, *Enterococcus faecium* NCIMB11181, on the intestinal barrier and system immune status in *Escherichia coli* O78-challenged broiler chickens. *Probiotics Antimicrob. Proteins* **2019**, *11*, 946–956, doi:10.1007/s12602-018-9434-7.
- Kan, L.; Guo, F.; Liu, Y.; Pham, V.H.; Guo, Y.; Wang, Z. Probiotics *Bacillus licheniformis* improves intestinal health of subclinical necrotic enteritis-challenged broilers. *Front. Microbiol.* **2021**, *12*, 623739, doi:10.3389/fmicb.2021.623739.
- Konieczka, P.; Sandvang, D.; Kinsner, M.; Szkopek, D.; Szyryńska, N.; Jankowski, J. *Bacillus*-based probiotics affect gut barrier integrity in different ways in chickens subjected to optimal or challenge conditions. *Vet. Microbiol.* **2022**, *265*, doi:10.1016/j.vetmic.2021.109323.
- Lan, D.; Xun, X.Y.; Hu, Y.D.; Li, N.Z.; Yang, C.W.; Jiang, X.S.; Liu, Y.P. Research on the effect of *Pediococcus pentosaceus* on *Salmonella enteritidis* -infected chicken. *Biomed Res. Int.* **2020**, *2020*, doi:10.1155/2020/6416451.
- Li, Y.; Zhang, H.; Chen, Y.P.; Yang, M.X.; Zhang, L.L.; Lu, Z.X.; Zhou, Y.M.; Wang, T. *Bacillus amyloliquefaciens* supplementation alleviates immunological stress and intestinal damage in lipopolysaccharide-challenged broilers. *Anim. Feed Sci. Technol.* **2015**, *208*, 119–131, doi:https://doi.org/10.1016/j.anifeedsci.2015.07.001.
- Li, Z.; Wang, W.; Lv, Z.; Liu, D.; Guo, Y. *Bacillus subtilis* and yeast cell wall improve the intestinal health of broilers challenged by *Clostridium perfringens*. *Br. Poult. Sci.* **2017**, *58*, 635–643, doi:10.1080/00071668.2017.1370697.
- Li, Z.; Wang, W.; Liu, D.; Guo, Y. Effects of *Lactobacillus acidophilus* on the growth performance and intestinal health of broilers challenged with *Clostridium perfringens*. *J. Anim. Sci. Biotechnol.* **2018**, *9*, 1–10, doi:10.1186/s40104-018-0243-3.
- Liu, L.; Ling, H.; Zhang, W.; Zhou, Y.; Li, Y.; Peng, N.; Zhao, S. Functional comparison of *Clostridium butyricum* and sodium butyrate supplementation on growth, intestinal health, and the anti-inflammatory response of broilers. *Front. Microbiol.* **2022**, *13*, 1–11, doi:10.3389/fmicb.2022.914212.
- Liu, Y.; Zhang, S.; Luo, Z.; Liu, D. Supplemental *Bacillus subtilis* PB6 improves growth performance and gut health in broilers

- challenged with *Clostridium perfringens*. *J. Immunol. Res.* **2021**, *2021*, 2549541, doi:10.1155/2021/2549541.
- Memon, F.U.; Yang, Y.; Leghari, I.H.; Lv, F.; Soliman, A.M.; Zhang, W.; Si, H. Transcriptome analysis revealed ameliorative effects of *Bacillus* based probiotic on immunity, gut barrier system, and metabolism of chicken under an experimentally induced *Eimeria tenella* infection. *Genes (Basel)*. **2021**, *12*, doi:10.3390/genes12040536.
- Mohammed, E.S.I.; Radey, R. Immunomodulation of antimicrobial peptides expression in the gastrointestinal tract by probiotics in response to stimulation by *Salmonella minnesota* Lipopolysaccharides. *Probiotics Antimicrob. Proteins* **2021**, *13*, 1157–1172, doi:10.1007/s12602-021-09746-y.
- Mohsin, M.; Zhang, Z.; Yin, G. Effect of probiotics on the performance and intestinal health of broiler chickens infected with *Eimeria tenella*. *Vaccines* **2022**, *10*, 1–14, doi:10.3390/vaccines10010097.
- Mountzouris, K.C.; Palamidi, I.; Paraskeuas, V.; Griela, E.; Fegeros, K. Dietary probiotic form modulates broiler gut microbiota indices and expression of gut barrier genes including essential components for gut homeostasis. *J. Anim. Physiol. Anim. Nutr. (Berl)*. **2019**, *103*, 1143–1159, doi:https://doi.org/10.1111/jpn.13112.
- Musa, B.B.; Duan, Y.; Khawar, H.; Sun, Q.; Ren, Z.; Elsiddig Mohamed, M.A.; Abbasi, I.H.R.; Yang, X. *Bacillus subtilis* B21 and *Bacillus licheniformis* B26 improve intestinal health and performance of broiler chickens with *Clostridium perfringens* -induced necrotic enteritis. *J. Anim. Physiol. Anim. Nutr. (Berl)*. **2019**, *103*, 1039–1049, doi:10.1111/jpn.13082.
- Qiu, K.; Li, C.L.; Wang, J.; Qi, G.H.; Gao, J.; Zhang, H.J.; Wu, S.G. Effects of dietary supplementation with *Bacillus subtilis*, as an alternative to antibiotics, on growth performance, serum immunity, and intestinal health in broiler chickens. *Front. Nutr.* **2021**, *8*, 1–13, doi:10.3389/fnut.2021.786878.
- Wang, H.; Ni, X.; Qing, X.; Liu, L.; Lai, J.; Khaliq, A.; Li, G.; Pan, K.; Jing, B.; Zeng, D. Probiotic enhanced intestinal immunity in broilers against subclinical necrotic enteritis. *Front. Immunol.* **2017**, *8*, 1–14, doi:10.3389/fimmu.2017.01592.
- Wang, J.; Ishfaq, M.; Miao, Y.; Liu, Z.; Hao, M.; Wang, C.; Wang, J.; Chen, X. Dietary administration of *Bacillus subtilis* KC1 improves growth performance, immune response, heat stress tolerance, and disease resistance of broiler chickens. *Poult. Sci.* **2022**, *101*, 1–13, doi:10.1016/j.psj.2021.101693.
- Wang, S.; Peng, Q.; Jia, H.M.; Zeng, X.F.; Zhu, J.L.; Hou, C.L.; Liu, X.T.; Yang, F.J.; Qiao, S.Y. Prevention of *Escherichia coli* infection in broiler chickens with *Lactobacillus plantarum* B1. *Poult. Sci.* **2017**, *96*, 2576–2586, doi:10.3382/ps/pex061.
- Wang, W.; Li, Z.; Han, Q.; Guo, Y.; Zhang, B.; D'inca, R. Dietary live yeast and mannan-oligosaccharide supplementation attenuate intestinal inflammation and barrier dysfunction induced by *Escherichia coli* in broilers. *Br. J. Nutr.* **2016**, *116*, 1878–1888, doi:DOI: 10.1017/S0007114516004116.
- Wang, Y.; Xu, Y.; Xu, S.; Yang, J.; Wang, K.; Zhan, X. *Bacillus subtilis* DSM29784 alleviates negative effects on growth performance in broilers by improving the intestinal health under necrotic enteritis challenge. *Front. Microbiol.* **2021**, *12*, 2470.
- Wu, S.; Liu, Y.; Duan, Y.; Wang, F.; Guo, F.; Yan, F.; Yang, X.; Yang, X. Intestinal toxicity of deoxynivalenol is limited by supplementation with *Lactobacillus plantarum* JM113 and consequentially altered gut microbiota in broiler chickens. *J. Anim. Sci. Biotechnol.* **2018**, *9*, 74, doi:10.1186/s40104-018-0286-5.
- Wu, Y.; Wang, B.; Zeng, Z.; Liu, R.; Tang, L.; Gong, L.; Li, W. Effects of probiotics *Lactobacillus plantarum* 16 and *Paenibacillus polymyxa* 10 on intestinal barrier function, antioxidative capacity, apoptosis, immune response, and biochemical parameters in broilers. *Poult. Sci.* **2019**, *98*, 5028–5039, doi:https://doi.org/10.3382/ps/pez226.
- Wu, Y.; Shao, Y.; Song, B.; Zhen, W.; Wang, Z.; Guo, Y.; Shahid, M.S.; Nie, W. Effects of *Bacillus coagulans* supplementation on the growth performance and gut health of broiler chickens with *Clostridium perfringens*-induced necrotic enteritis. *J. Anim. Sci. Biotechnol.* **2018**, *9*, 1–14, doi:10.1186/s40104-017-0220-2.
- Wu, Y.; Zhen, W.; Geng, Y.; Wang, Z.; Guo, Y. Pretreatment with probiotic *Enterococcus faecium* NCIMB 11181 ameliorates necrotic enteritis-induced intestinal barrier injury in broiler chickens. *Sci. Rep.* **2019**, *9*, 10256, doi:10.1038/s41598-019-46578-x.
- Wu, Z.; Yang, K.; Zhang, A.; Chang, W.; Zheng, A.; Chen, Z.; Cai, H.; Liu, G. Effects of *Lactobacillus acidophilus* on the growth

- performance, immune response, and intestinal barrier function of broiler chickens challenged with *Escherichia coli* O157. *Poult. Sci.* **2021**, *100*, 101323, doi:10.1016/j.psj.2021.101323.
- Xiao, D.; Wang, Z.; Dai, X.; Hu, Y.; Zhong, M.; Xiong, L.; Jiang, C.; Khaliq, A.; Ni, X.; Zeng, D.; et al. Effects of *Bacillus methylotrophicus* SY200 supplementation on growth performance, antioxidant status, intestinal morphology, and immune function in broiler chickens. *Probiotics Antimicrob. Proteins* **2022**, doi:10.1007/s12602-022-09924-6.
- Xu, X.; Yang, S.; Olajide, J.S.; Qu, Z.; Gong, Z.; Wang, J.; Zhang, Y.; Wang, H.; Xiong, L.; Zhang, K.; et al. *Clostridium butyricum* supplement can ameliorate the intestinal barrier roles in broiler chickens experimentally infected with *Clostridium perfringens*. *Front. Physiol.* **2021**, *12*, 1572.
- Yang, Y.; Memon, F.U.; Hao, K.; Jiang, M.; Guo, L.; Liu, T.; Lv, F.; Zhang, W.; Zhang, Y.; Si, H. The combined use of *Bacillus subtilis*-based probiotic and anticoccidial herb had a better anti-*Eimeria tenella* efficiency. *J. Appl. Poult. Res.* **2021**, *30*, doi:10.1016/j.japr.2021.100181.
- Zhang, B.; Zhang, H.; Yu, Y.; Zhang, R.; Wu, Y.; Yue, M.; Yang, C. Effects of *Bacillus coagulans* on growth performance, antioxidant capacity, immunity function, and gut health in broilers. *Poult. Sci.* **2021**, *100*, 101168, doi:10.1016/j.psj.2021.101168.
- Zhang, H.; Zhou, Y.; Xu, H.; Liang, C.; Zhai, Z. *Bacillus amyloliquefaciens* BLCC1-0238 alone or in combination with mannan-oligosaccharides alleviates subclinical necrotic enteritis in broilers. *Probiotics Antimicrob. Proteins* **2022**, *14*, 158–168, doi:10.1007/s12602-021-09853-w.
- Zhao, Y.; Zeng, Y.; Zeng, D.; Wang, H.; Sun, N.; Xin, J.; Zhou, M.; Yang, H.; Lei, L.; Ling, H.; et al. Dietary probiotic supplementation suppresses subclinical necrotic enteritis in broiler chickens in a microbiota-dependent manner. *Front. Immunol.* **2022**, *13*, 1–18, doi:10.3389/fimmu.2022.855426.
- Zhen, W.; Shao, Y.; Gong, X.; Wu, Y.; Geng, Y.; Wang, Z.; Guo, Y. Effect of dietary *Bacillus coagulans* supplementation on growth performance and immune responses of broiler chickens challenged by *Salmonella enteritidis*. *Poult. Sci.* **2018**, *97*, 2654–2666, doi:https://doi.org/10.3382/ps/pey119.

**Disclaimer/Publisher's Note:** The statements, opinions and data contained in all publications are solely those of the individual author(s) and contributor(s) and not of MDPI and/or the editor(s). MDPI and/or the editor(s) disclaim responsibility for any injury to people or property resulting from any ideas, methods, instructions or products referred to in the content.
